# Supplementary material for: HCoV- and SARS-CoV-2 Cross-Reactive T Cells in CVID Patients
Source: Front Immunol. 2020 Dec 23;11:607918. doi: 10.3389/fimmu.2020.607918 (PMC7785785; doi:10.3389/fimmu.2020.607918)
Supplement: Supplementary file 3 [file Table_2.xlsx]

## Sheet: CVID
Supplementary Table 2a: Summary of CD154+CD137+CD4+ and CD137+CD8+ T cell frequencies in CVID patients. Reactive T cells > 0.005% within total CD4+ T cells and with a ≥ 1.2-fold response of the background control (DMSO) were considered as positive.
CVID CD4+ CD154+ CD137+
	SARS-CoV-2 N-term	SARS-CoV-2 C-term	SARS-CoV-2 NCAP	HCoV-229E N-term	HCoV-229E C-term	HCoV-OC43 N-term	HCoV-OC43 C-Term	SEB
CVID-1		0.05						38.2
CVID-2								34.228
CVID-3	0.019			0.049	0.021		0.02	35.239
CVID-4	0.149	0.089					0.011	40.569
CVID-5		0.12						45.72
CVID-6								36.7
CVID-7	0.027							43.333
CVID-8								34.239
CVID-9		0.36		0.27	0.31	0.27	0.37	41.03
CVID-10	0.26			0.25				41.79
CVID-11								36.45
n=	4	4	0	3	2	1	3	11
% =	36.3636	36.3636	0	27.2727	18.1818	9.09091	27.2727	100
CD8+ CD137+
CVID-1	0.78	0.92	0.54	0.94	0.97			38.45
CVID-2	0.59	1.34	0.57	0.3	0.49		0.34	45.62
CVID-3								37.55
CVID-4								52.93
CVID-5	0.53							52.03
CVID-6								44.21
CVID-7		0.36						68.08
CVID-8	0.68							59.36
CVID-9		0.62						56.93
CVID-10								35.6
CVID-11	0.91							38.02
n=	5	4	2	2	2	0	1	11
% =	45.4545	36.3636	18.1818	18.1818	18.1818	0	9.09091	100

## Sheet: post COVID-19_HC
Supplementary Table 2b: Summary of CD154+CD137+CD4+ and CD137+CD8+ T cell frequencies in post COVID-19 HC. Reactive T cells > 0.005% within total CD4+ T cells and with a ≥ 1.2-fold response of the background control (DMSO) were considered as positive.
post COVID-19 CD4+ CD154+ CD137+
	SARS-CoV-2 N-term	SARS-CoV-2 C-term	SARS-CoV-2 NCAP	HCoV-229E N-term	HCoV-229E C-term	HCoV-OC43 N-term	HCoV-OC43 C-Term	SEB
COVID-1	0.11	0.11	0.27	0.04	0.05		0.1	37.25
COVID-2	0.27	0.16	0.37	0.15	0.05	0.13	0.29	46.68
COVID-3								39.49
COVID-4	0.177	0.047	0.057		0.025		0.031	38.337
COVID-5	0.05							27.56
COVID-6	0.06	0.19						46.8
COVID-7	0.624	0.354	0.044	0.02	0.025	0.042	0.064	35.444
COVID-8		0.022			0.052			30.812
COVID-9	2.41	0.11	0.12	0.04	0.04		0.05	43.97
COVID-10	5.66				0.57	0.43	1.06	34.61
COVID-11								33.21
n=	8	7	5	4	7	3	6	11
% =	72.7273	63.6364	45.4545	36.3636	63.6364	27.2727	54.5455	100
post COVID-19 CD8+ CD137+
COVID-1	0.48	0.69	0.91	0.56	0.66	0.41		35.29
COVID-2	1.23	0.44	0.46	0.78	0.53	1.79	0.47	50.98
COVID-3								39.49
COVID-4	1.17	2.64	0.39	0.46	0.61	0.49	0.51	45.55
COVID-5								34.3
COVID-6								40.59
COVID-7	1.45	0.77	0.7	0.9	0.76	0.72	0.4	42.88
COVID-8								44.03
COVID-9	2.34						0.24	45.91
COVID-10	5.93				1.22	1.01	1.77	44.69
COVID-11	0.53	0.66	0.45	0.56	0.37	0.64	0.69	67.16
n=	7	5	5	5	6	6	6	11
% =	63.6364	45.4545	45.4545	45.4545	54.5455	54.5455	54.5455	100

## Sheet: unexposed_HC
Supplementary Table 2c: Summary of CD154+CD137+CD4+ and CD137+CD8+ T cell frequencies in unexposed HC. Reactive T cells > 0.005% within total CD4+ T cells and with a ≥ 1.2-fold response of the background control (DMSO) were considered as positive.
unexposed HC CD4+ CD154+ CD137+
	SARS-CoV-2 N-term	SARS-CoV-2 C-term	SARS-CoV-2 NCAP	HCoV-229E N-term	HCoV-229E C-term	HCoV-OC43 N-term	HCoV-OC43 C-Term	SEB
HC-1					0.05			38.08
HC-2	0.535	0.045	0.012	0.027		0.024	0.01	37.655
HC-3					0.019	0.017	0.069	41.619
HC-4	0.831	0.481	0.241	0.531	0.071		0.071	34.311
HC-5								33.133
HC-6	0.02	0.02						31.86
HC-7	0.63	0.24	0.19	0.18	0.17	0.16	0.31	41.33
HC-8	0.49	0.04						33.72
HC-9	0.097	0.067	0.067	0.027	0.057	0.037	0.047	47.727
HC-10	0.148	0.026	0.015	0.019	0.022	0.026	0.028	33.968
HC-11	0.022	0.021		0.026	0.016	0.017	0.029	43.872
HC-12	2.892	0.852	0.162	0.842	0.462	1.492	1.292	35.442
n=	9	9	6	7	8	7	8	12
% =	75	75	50	58.3333	66.6667	58.3333	66.6667	100
unexposed HC CD8+ CD137+
	SARS-CoV-2 Spike I	SARS-CoV-2 Spike II	SARS-CoV-2 NCAP	HCoV-229E SI	HCoV-229E SII	HCoV-OC43 SI	HCoV-OC43 SII	SEB
HC-1	2.82	2.8	1.6	0.88	0.96	1.34	1.12	45.87
HC-2	5.02	1.24	0.94	0.87	0.99	0.79	1.02	58.73
HC-3	3.3	3.44	1.58	2.83	1.82	1.64	2.22	46.42
HC-4	0.98	0.47	1.18	0.58	0.53	0.09	0.33	35.47
HC-5	0.65			0.26	0.28	0.3	0.33	35.84
HC-6	0.39	0.18	0.32	0.29	0.25	0.23		39.37
HC-7	0.22			0.26			0.14	44.28
HC-8	0.19							37.25
HC-9	0.17	0.18	0.11	0.18	0.15	0.14	0.29	54.28
HC-10	0.35	0.34	0.46					40.39
HC-11	1.15	0.97	0.67	0.87	0.83	1.01	0.76	53.89
HC-12	2.03	0.61	0.18	0.57	0.37	0.95	1.04	30.64
n=	12	9	9	10	9	9	9	12
% =	100	75	75	83.3333	75	75	75	100
